# Supplementary material for: Hierarchically nanostructured MoS2 with rich in-plane edges as a high-performance electrocatalyst for the hydrogen evolution reaction
Source: Royal Society of Chemistry journal article supplement (doi:10.1039/c6ta06174e), 2016-01-01
Supplement: c6ta06174e1.pdf [file c6ta06174e1.pdf]

## Supporting information

# Hierarchically Nanostructured MoS<sub>2</sub> with Rich In-plane Edges as a High-performance Electrocatalyst for Hydrogen Evolution Reaction

*Haoliang Huang<sup>+</sup>, Liqin Chen<sup>+</sup>, Chuanhe Liu<sup>⌞</sup>, Xinshun Liu<sup>+</sup>, Senxuan Fang<sup>+</sup>,*

*Weipeng Liu<sup>+</sup>, Yingju Liu<sup>+,\*</sup>*

*<sup>+</sup>Department of Applied Chemistry, College of Materials and Energy, South China*

*Agricultural University, Guangzhou 510642, China*

*<sup>⌞</sup>Instrumental Analysis & Research Center, South China Agricultural University,*

*Guangzhou 510642, China*

\*Tel: 86-020-85280325. Fax: 86-020-85282366. E-mail: [liuyingju@hotmail.com](mailto:liuyingju@hotmail.com)

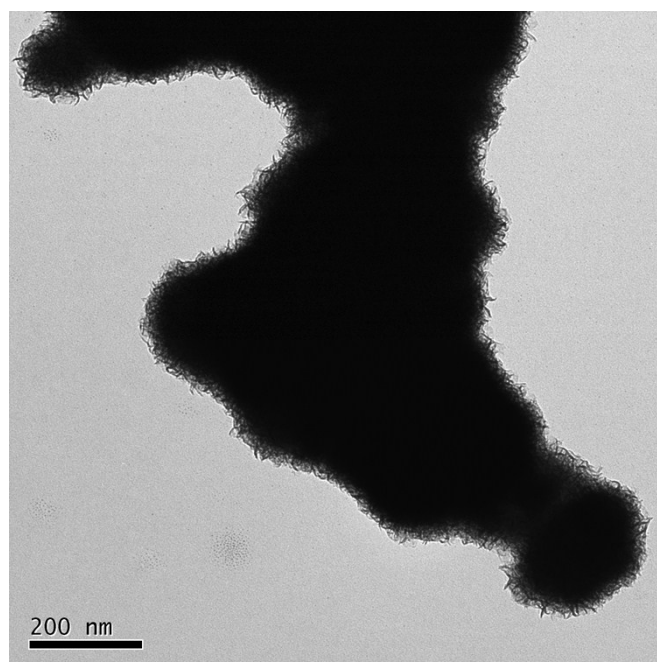

**Figure S1.** TEM image of MoS<sub>2</sub> aggregates synthesized in 100% EG.

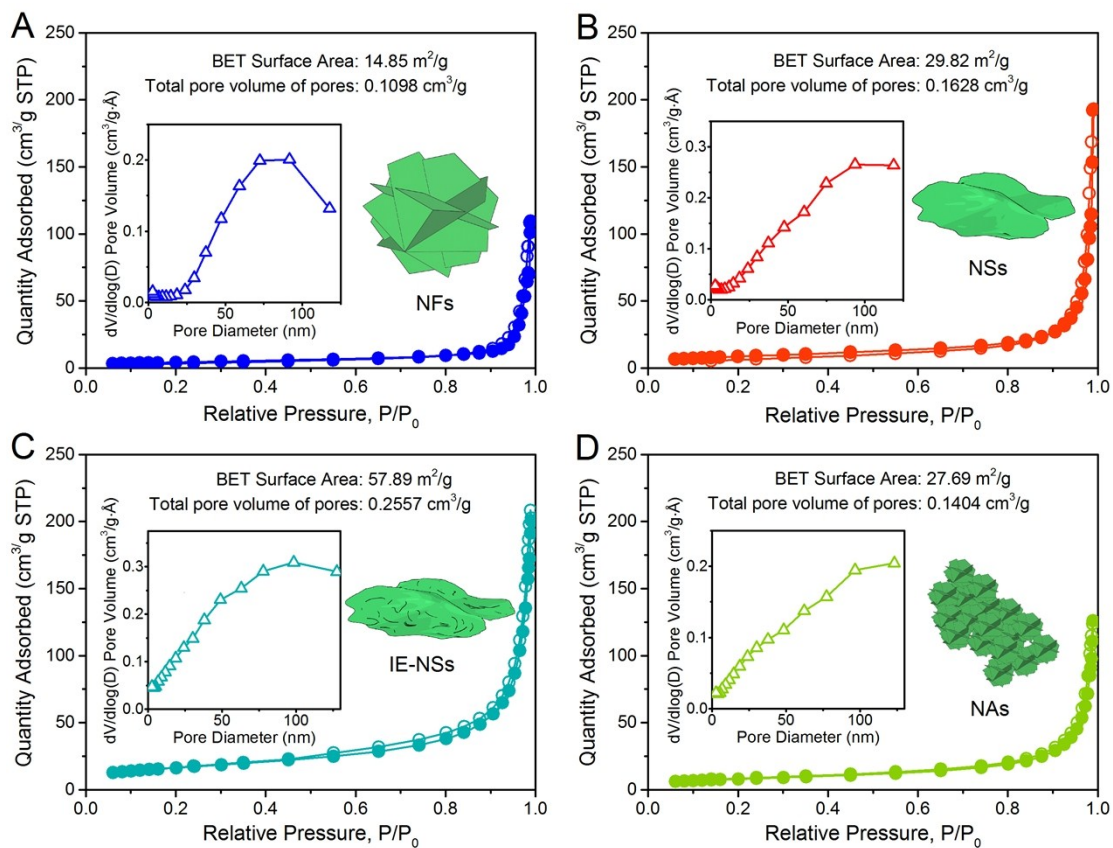

**Figure S2.**  $N_2$  adsorption-desorption isotherms and corresponding absorption pore size distributions using BJH model (inset) of as-prepared samples ( $\text{MoS}_2$  NFs,  $\text{MoS}_2$  NSs, IE- $\text{MoS}_2$  NSs and  $\text{MoS}_2$  NAs).

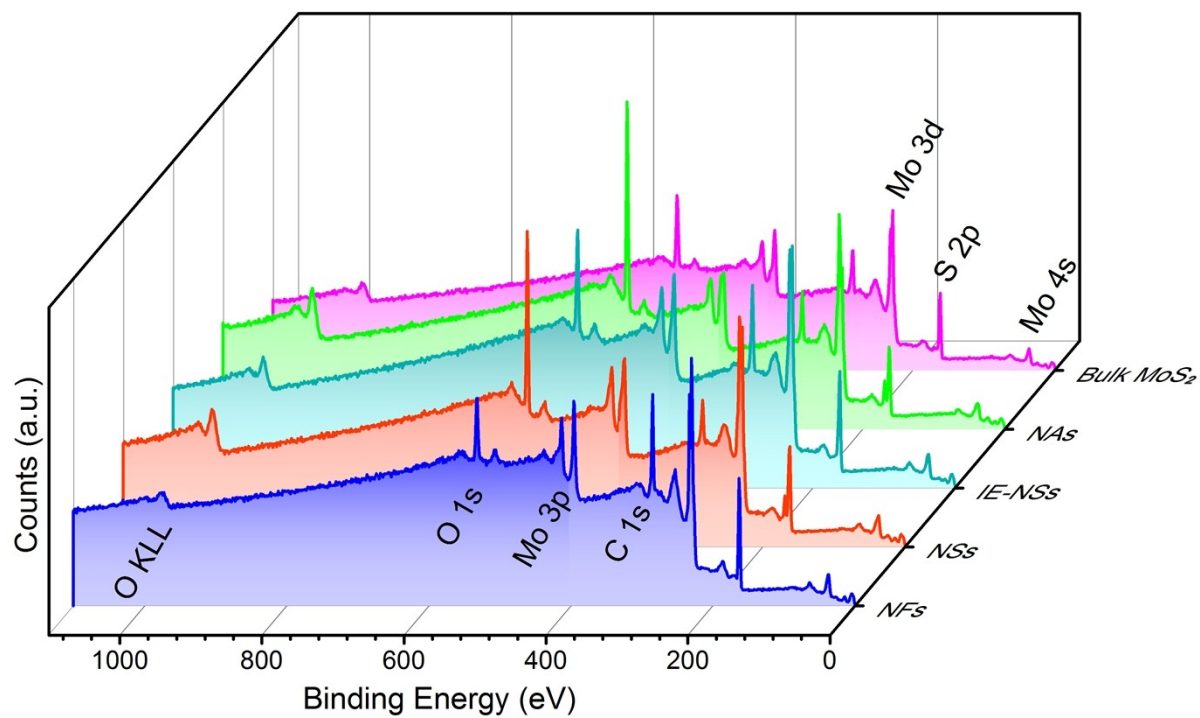

**Figure S3.** XPS survey spectra of bulk MoS<sub>2</sub> crystal, and as-prepared samples (MoS<sub>2</sub> NFs, MoS<sub>2</sub> NSs, IE-MoS<sub>2</sub> NSs and MoS<sub>2</sub> NAs). Only Mo, S, O and C can be detected in these five samples, and the atomic ratios between Mo and S approach to the stoichiometric number of MoS<sub>2</sub>, varying from 1.8 to 2.1 (1.9 in bulk MoS<sub>2</sub> crystal, 2.1 in MoS<sub>2</sub> NFs, 1.9 in MoS<sub>2</sub> NSs, 2.1 in IE-MoS<sub>2</sub> NSs and 1.8 in MoS<sub>2</sub> NAs).

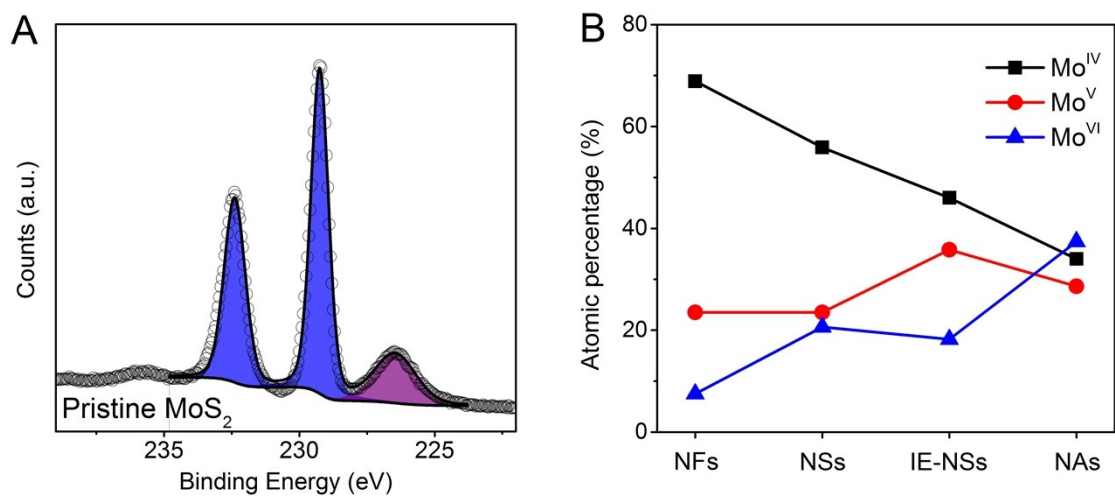

**Figure S4.** (A) High-resolution XPS survey spectra of pristine MoS<sub>2</sub> crystal within of Mo 3d and S 2s regions. (B) Chemical environments of Mo in as-prepared MoS<sub>2</sub> electrocatalyst.

**Table S1.** Electrochemical parameters of the as-prepared nanostructured MoS<sub>2</sub>.

|                         | Onset $\eta$<br>(mV) | Tafel slope<br>(mV dec <sup>-1</sup> ) | EDLC<br>(mF cm <sup>-2</sup> ) | ECSA<br>factor | Intrinsic activity<br>@ $\eta=0.25$ V<br>( $\mu\text{A cm}_{\text{ECSA}}^{-2}$ ) | R <sub>ct</sub><br>( $\Omega$ ) |
|-------------------------|----------------------|----------------------------------------|--------------------------------|----------------|----------------------------------------------------------------------------------|---------------------------------|
| MoS <sub>2</sub> NFs    | 162                  | 48.9                                   | 9.30                           | 155            | -51.1                                                                            | 114                             |
| MoS <sub>2</sub> NSs    | 122                  | 47.5                                   | 28.8                           | 480            | -85.0                                                                            | 35.0                            |
| IE-MoS <sub>2</sub> NSs | 87.2                 | 41.0                                   | 40.4                           | 673            | -222                                                                             | 11.2                            |
| MoS <sub>2</sub> NAs    | 128                  | 56.1                                   | 6.95                           | 116            | -127                                                                             | 97.1                            |

**Table S2.** Comparison of HER performance of in-plane edge rich MoS<sub>2</sub> nanosheets with other MoS<sub>2</sub>-based electrocatalysts.

| Catalyst                                                    | Onset $\eta$ ( $\eta_0$ , mV) | Tafel slope (mV dec <sup>-1</sup> ) | Current density ( $j$ , mA cm <sup>-2</sup> ) | Corresponding $\eta$ ( $\eta_j$ , mV) | Electrochemical double layered capacitance ( $C_{dl}$ , mF cm <sup>-2</sup> ) | References |
|-------------------------------------------------------------|-------------------------------|-------------------------------------|-----------------------------------------------|---------------------------------------|-------------------------------------------------------------------------------|------------|
| Interlayer-expanded MoS <sub>2</sub>                        | 103                           | 49                                  | -10                                           | 149                                   | 15.3                                                                          | 1          |
| Double-gyroid MoS <sub>2</sub> film                         | 150~200                       | 50                                  | N.A.                                          | N.A.                                  | 1.1~4.8                                                                       | 2          |
| Amorphous MoS <sub>2</sub>                                  | 150                           | 60                                  | -10                                           | 200                                   | 5.4                                                                           | 3          |
| Metallic MoS <sub>2</sub> nanosheets                        | N.A.                          | 43                                  | -10                                           | 187                                   | 22                                                                            | 4          |
| MoS <sub>2</sub> nanosheet                                  | N.A.                          | 68                                  | -4.56                                         | 150                                   | N.A.                                                                          | 5          |
| Few layer MoS <sub>2</sub> nanodots                         | 90                            | 61                                  | -10                                           | 248                                   | 2.15                                                                          | 6          |
| MoS <sub>2</sub> @OMC                                       | 120~132                       | 60~65                               | -10                                           | 178~192                               | N.A.                                                                          | 7          |
| MoS <sub>2</sub> /rGO hydrogel                              | 125                           | 41                                  | -12                                           | 200                                   | 29.6                                                                          | 8          |
| Hollow structured micro/nano MoS <sub>2</sub> spheres       | 112                           | 74                                  | -10                                           | 214                                   | 15.1                                                                          | 9          |
| Oxygen-incorporated MoS <sub>2</sub> nanosheets             | 120                           | 55                                  | -126.5                                        | 300                                   | 37.7                                                                          | 10         |
| active-site-rich MoS <sub>2</sub>                           | 180                           | 53.5                                | -68                                           | 300                                   | 25.7                                                                          | 11         |
| MoS <sub>2</sub> /NCNFs                                     | N.A.                          | 48                                  | -65.6                                         | 200                                   | 22.7                                                                          | 12         |
| MoS <sub>2</sub> nanoparticles/RGO                          | ~ 100                         | 41                                  | N.A.                                          | N.A.                                  | N.A.                                                                          | 13         |
| MoS <sub>2</sub> nanoparticles on mesoporous graphene foams | 100                           | 42                                  | -100                                          | 200                                   | N.A.                                                                          | 14         |
| Monolayer MoS <sub>2</sub> on nanoporous gold               | 118                           | 46                                  | -10                                           | 226                                   | N.A.                                                                          | 15         |
| MoS <sub>2</sub> nanosheets/RGO                             | ~ 140                         | 41                                  | -23                                           | 200                                   | N.A.                                                                          | 16         |
| MoS <sub>2</sub> $\perp$ RGO                                | N.A.                          | 43                                  | -10                                           | 172                                   | 6.045                                                                         | 17         |
| MoS <sub>x</sub> on crumpled graphene balls                 | 130                           | 51.9                                | -220                                          | 300                                   | N.A.                                                                          | 18         |
| MoS <sub>x</sub> /N-doped CNT                               | ~75                           | 40                                  | -10                                           | ~110                                  | N.A.                                                                          | 19         |
| Defect-rich MoS <sub>2</sub> ultrathin nanosheets           | 120                           | 50                                  | -13                                           | 200                                   | N.A.                                                                          | 20         |
| IE-MoS <sub>2</sub> NSs                                     | 87                            | 41                                  | -324<br>-10                                   | 300<br>167                            | 40.4                                                                          | This work  |

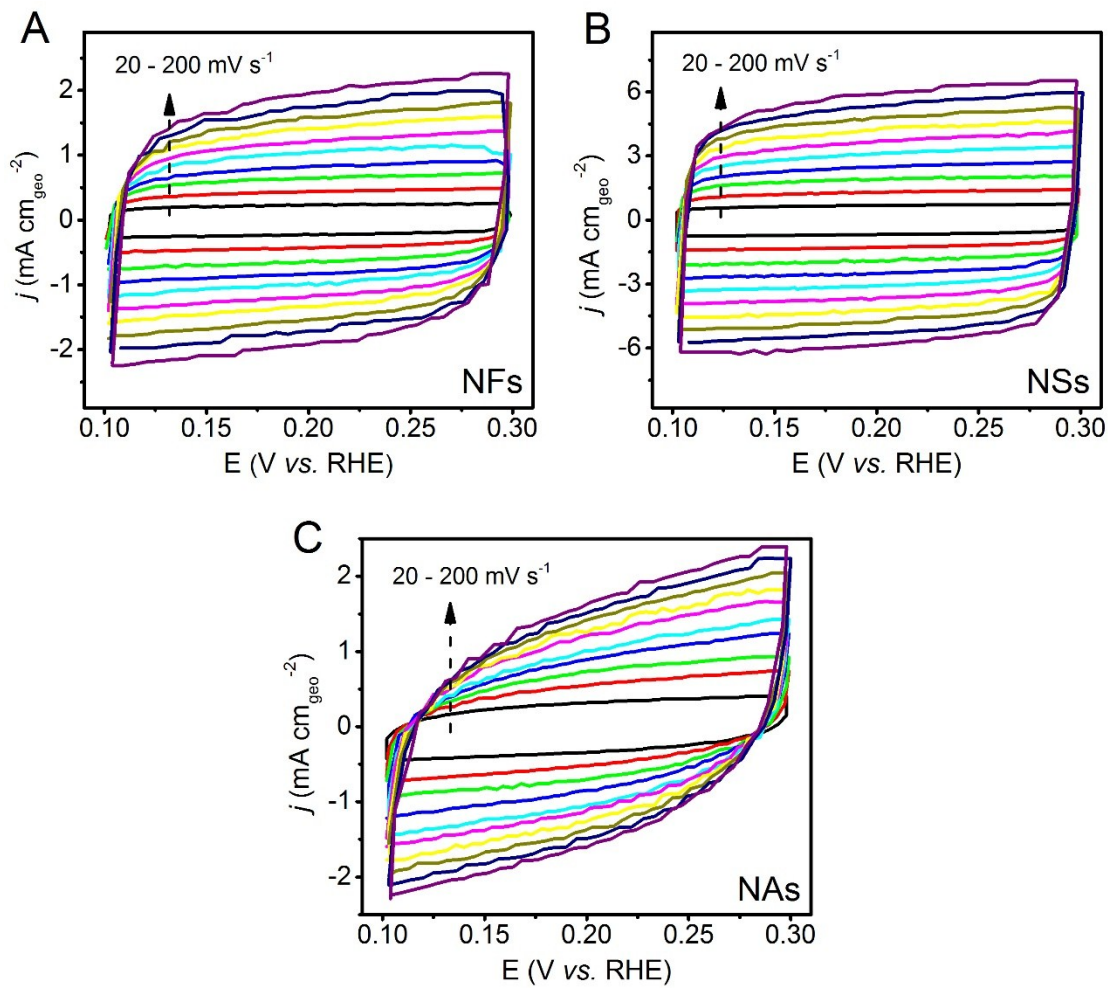

**Figure S5.** Cyclic voltammogram curves of MoS<sub>2</sub> NFs, MoS<sub>2</sub> NSs and MoS<sub>2</sub> NAs in the region of 0.1-0.3 V vs. RHE with scan rate from 20 mV s<sup>-1</sup> to 200 mV s<sup>-1</sup>.



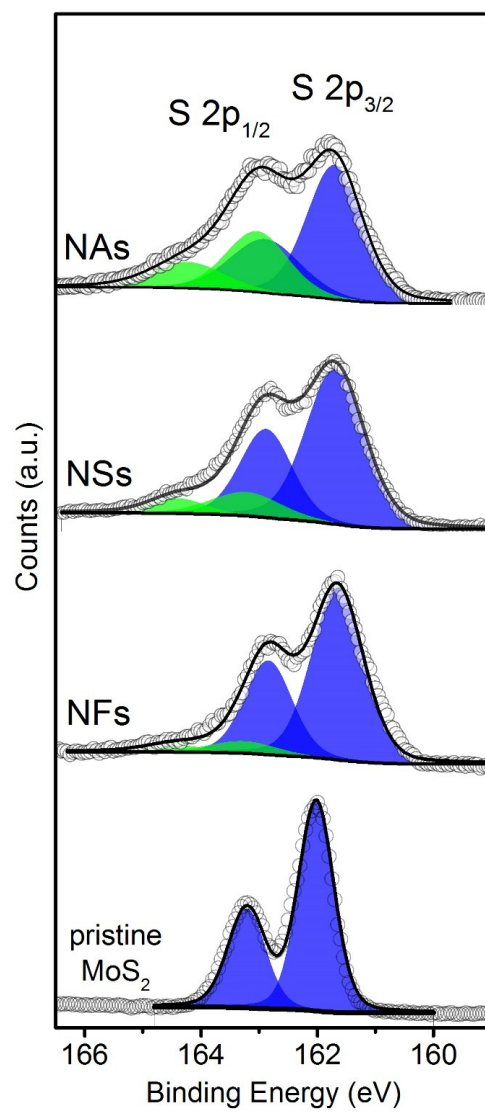

**Figure S6.** High-resolution XPS spectra of S 2p region of pristine MoS<sub>2</sub>, MoS<sub>2</sub> NFs, MoS<sub>2</sub> NSs, and MoS<sub>2</sub> NAs.

## References

1. Gao, M. R.; Chan, M. K.; Sun, Y., Edge-terminated Molybdenum Disulfide with a 9.4 Å Interlayer Spacing for Electrochemical Hydrogen Production. *Nat. Commun.* **2015**, *6*, 7493.
2. Kibsgaard, J.; Chen, Z.; Reinecke, B. N.; Jaramillo, T. F., Engineering the Surface Structure of MoS<sub>2</sub> to Preferentially Expose Active Edge Sites for Electrocatalysis. *Nat. Mater.* **2012**, *11* (11), 963-969.
3. Benck, J. D.; Chen, Z.; Kuritzky, L. Y.; Forman, A. J.; Jaramillo, T. F., Amorphous Molybdenum Sulfide Catalysts for Electrochemical Hydrogen Production: Insights into the Origin of Their Catalytic Activity. *ACS Catal.* **2012**, *2* (9), 1916-1923.
4. Lukowski, M. A.; Daniel, A. S.; Meng, F.; Forticaux, A.; Li, L.; Jin, S., Enhanced Hydrogen Evolution Catalysis from Chemically Exfoliated Metallic MoS<sub>2</sub> Nanosheets. *J. Am. Chem. Soc.* **2013**, *135* (28), 10274-10277.
5. Wu, Z.; Fang, B.; Wang, Z.; Wang, C.; Liu, Z.; Liu, F.; Wang, W.; Alfantazi, A.; Wang, D.; Wilkinson, D. P., MoS<sub>2</sub> nanosheets: A Designed Structure with High Active Site Density for the Hydrogen Evolution Reaction. *ACS Catal.* **2013**, *3* (9), 2101-2107.
6. Benson, J.; Li, M.; Wang, S.; Wang, P.; Papakonstantinou, P., Electrocatalytic Hydrogen Evolution Reaction on Edges of a Few Layer Molybdenum Disulfide Nanodots. *ACS Appl. Mater. Interfaces* **2015**, *7* (25), 14113-14122.
7. Seo, B.; Jung, G. Y.; Sa, Y. J.; Jeong, H. Y.; Cheon, J. Y.; Lee, J. H.; Kim, H. Y.; Kim, J. C.; Shin, H. S.; Kwak, S. K.; Joo, S. H., Monolayer-Precision Synthesis of Molybdenum Sulfide Nanoparticles and Their Nanoscale Size Effects in the Hydrogen Evolution Reaction. *ACS Nano* **2015**, *9* (4), 3728-3739.
8. Zhang, J.; Zhao, L.; Liu, A.; Li, X.; Wu, H.; Lu, C., Three-Dimensional MoS<sub>2</sub>/RGO Hydrogel with Extremely High Double-Layer Capacitance as Active Catalyst for Hydrogen Evolution Reaction. *Electrochim. Acta* **2015**, *182*, 652-658.
9. Guo, B.; Yu, K.; Li, H.; Song, H.; Zhang, Y.; Lei, X.; Fu, H.; Tan, Y.; Zhu, Z., Hollow Structured Micro/Nano MoS<sub>2</sub> Spheres for High Electrocatalytic Activity Hydrogen Evolution Reaction. *ACS Appl. Mater. Interfaces* **2016**, *8* (8), 5517-5525.
10. Xie, J.; Zhang, J.; Li, S.; Grote, F.; Zhang, X.; Zhang, H.; Wang, R.; Lei, Y.; Pan, B.; Xie, Y., Controllable Disorder Engineering in Oxygen-Incorporated MoS<sub>2</sub> Ultrathin Nanosheets for Efficient Hydrogen Evolution. *J. Am. Chem. Soc.* **2013**, *135* (47), 17881-17888.
11. Liu, N.; Guo, Y.; Yang, X.; Lin, H.; Yang, L.; Shi, Z.; Zhong, Z.; Wang, S.; Tang, Y.; Gao,

- Q., Microwave-Assisted Reactant-Protecting Strategy toward Efficient MoS<sub>2</sub> Electrocatalysts in Hydrogen Evolution Reaction. *ACS Appl. Mater. Interfaces* **2015**, *7* (42), 23741-23749.
12. Guo, Y.; Zhang, X.; Zhang, X.; You, T., Defect- and S-Rich Ultrathin MoS<sub>2</sub> nanosheet Embedded N-Doped Carbon Nanofibers for Efficient Hydrogen Evolution. *J. Mater. Chem. A* **2015**, *3* (31), 15927-15934.
  13. Li, Y.; Wang, H.; Xie, L.; Liang, Y.; Hong, G.; Dai, H., MoS<sub>2</sub> Nanoparticles Grown on Graphene: an Advanced Catalyst for the Hydrogen Evolution Reaction. *J. Am. Chem. Soc.* **2011**, *133* (19), 7296-7299.
  14. Liao, L.; Zhu, J.; Bian, X.; Zhu, L.; Scanlon, M. D.; Girault, H. H.; Liu, B., MoS<sub>2</sub> Formed on Mesoporous Graphene as a Highly Active Catalyst for Hydrogen Evolution. *Adv. Funct. Mater.* **2013**, *23* (42), 5326-5333.
  15. Tan, Y.; Liu, P.; Chen, L.; Cong, W.; Ito, Y.; Han, J.; Guo, X.; Tang, Z.; Fujita, T.; Hirata, A.; Chen, M. W., Monolayer MoS<sub>2</sub> Films Supported by 3d Nanoporous Metals for High-Efficiency Electrocatalytic Hydrogen Production. *Adv. Mater.* **2014**, *26* (47), 8023-8028.
  16. Zheng, X.; Xu, J.; Yan, K.; Wang, H.; Wang, Z.; Yang, S., Space-Confined Growth of MoS<sub>2</sub> nanosheets within Graphite: The Layered Hybrid of MoS<sub>2</sub> and Graphene as an Active Catalyst for Hydrogen Evolution Reaction. *Chem. Mater.* **2014**, *26* (7), 2344-2353.
  17. Deng, Z. H.; Li, L.; Ding, W.; Xiong, K.; Wei, Z. D., Synthesized Ultrathin MoS<sub>2</sub> Nanosheets Perpendicular to Graphene for Catalysis of Hydrogen Evolution Reaction. *Chem. Commun.* **2015**, *51* (10), 1893-1896.
  18. Smith, A. J.; Chang, Y. H.; Raidongia, K.; Chen, T. Y.; Li, L. J.; Huang, J., Molybdenum Sulfide Supported on Crumpled Graphene Balls for Electrocatalytic Hydrogen Production. *Adv. Energy Mater.* **2014**, *4* (14), 1400398.
  19. Li, D. J.; Maiti, U. N.; Lim, J.; Choi, D. S.; Lee, W. J.; Oh, Y.; Lee, G. Y.; Kim, S. O., Molybdenum Sulfide/N-Doped CNT Forest Hybrid Catalysts for High Performance Hydrogen Evolution Reaction. *Nano Lett.* **2014**, *14* (3), 1228-1233.
  20. Xie, J.; Zhang, H.; Li, S.; Wang, R.; Sun, X.; Zhou, M.; Zhou, J.; Lou, X. W.; Xie, Y., Defect-Rich MoS<sub>2</sub> Ultrathin Nanosheets with Additional Active Edge Sites for Enhanced Electrocatalytic Hydrogen Evolution. *Adv. Mater.* **2013**, *25* (40), 5807-5813.
